# Supplementary material for: Online-Delivered Group and Personal Exercise Programs to Support Low Active Older Adults’ Mental Health During the COVID-19 Pandemic: Randomized Controlled Trial
Source: J Med Internet Res. 2021 Jul 30;23(7):e30709. doi: 10.2196/30709 (PMC8330630; doi:10.2196/30709)
Supplement: Multimedia Appendix 13 [file jmir_v23i7e30709_app13.docx]

**Multimedia Appendix 13. Correlations among study variables at week 4.**

| Variable | 1 | 2 | 3 | 4 | 5 | 6 | 7 | 8 |
| --- | --- | --- | --- | --- | --- | --- | --- | --- |
| 1. Gender |  |  |  |  |  |  |  |  |
| Sig (2-tailed) |  |  |  |  |  |  |  |  |
|  |  |  |  |  |  |  |  |  |
| 1. Age | .04 |  |  |  |  |  |  |  |
| Sig (2-tailed) | .55 |  |  |  |  |  |  |  |
|  |  |  |  |  |  |  |  |  |
| 1. Living Situation | .16b | -.17a |  |  |  |  |  |  |
| Sig (2-tailed) | .01 | .007 |  |  |  |  |  |  |
|  |  |  |  |  |  |  |  |  |
| 1. Chronic Conditions | -.20a | -.02 | -.009 |  |  |  |  |  |
| Sig (2-tailed) | .002 | .81 | .89 |  |  |  |  |  |
|  |  |  |  |  |  |  |  |  |
| 1. Satisfaction with Life | .25a | .05 | .16b | -.20a |  |  |  |  |
| Sig (2-tailed) | < .001 | .50 | .02 | .005 |  |  |  |  |
|  |  |  |  |  |  |  |  |  |
| 1. Physical Health | .02 | .17b | .07 | -.23a | .43a |  |  |  |
| Sig (2-tailed) | .79 | .02 | .31 | .001 | < .001 |  |  |  |
|  |  |  |  |  |  |  |  |  |
| 1. Mental Health | .25a | .17b | .11 | -.24a | .69a | .51a |  |  |
| Sig (2-tailed) | < .001 | .02 | .13 | < .001 | < .001 | < .001 |  |  |
|  |  |  |  |  |  |  |  |  |
| 1. Flourishing | .17b | .07 | .16b | -.20a | .64a | .34a | .61 a |  |
| Sig (2-tailed) | .01 | .30 | .02 | .004 | < .001 | < .001 | < .001 |  |
|  |  |  |  |  |  |  |  |  |
| 1. Depressive Symptoms | -.25a | -.04 | -.20a | .28a | -.67a | -.42a | -.71a | -.69a |
| Sig (2-tailed) | < .001 | .62 | .005 | < .001 | < .001 | < .001 | < .001 | < .001 |
|  |  |  |  |  |  |  |  |  |

*Note.* Living Situation = Living with others (anchored against living alone), Gender = Male (anchored against referent Female, Chronic Conditions = Number of chronic health conditions. aCorrelation is significant at the .01 level (2-tailed). bCorrelation is significant at the .05 level (2-tailed).
