# Supplementary material for: Online-Delivered Group and Personal Exercise Programs to Support Low Active Older Adults’ Mental Health During the COVID-19 Pandemic: Randomized Controlled Trial
Source: J Med Internet Res. 2021 Jul 30;23(7):e30709. doi: 10.2196/30709 (PMC8330630; doi:10.2196/30709)
Supplement: Multimedia Appendix 14 [file jmir_v23i7e30709_app14.docx]

**Multimedia Appendix 14. Correlations among study variables at week 6.**

| Variable | 1 | 2 | 3 | 4 | 5 | 6 | 7 | 8 |
| --- | --- | --- | --- | --- | --- | --- | --- | --- |
| 1. Gender |  |  |  |  |  |  |  |  |
| Sig (2-tailed) |  |  |  |  |  |  |  |  |
|  |  |  |  |  |  |  |  |  |
| 1. Age | .04 |  |  |  |  |  |  |  |
| Sig (2-tailed) | .55 |  |  |  |  |  |  |  |
|  |  |  |  |  |  |  |  |  |
| 1. Living Situation | .16b | -.17a |  |  |  |  |  |  |
| Sig (2-tailed) | .01 | .007 |  |  |  |  |  |  |
|  |  |  |  |  |  |  |  |  |
| 1. Chronic Conditions | -.20a | -.02 | -.009 |  |  |  |  |  |
| Sig (2-tailed) | .002 | .81 | .89 |  |  |  |  |  |
|  |  |  |  |  |  |  |  |  |
| 1. Satisfaction with Life | .21a | -.02 | .21a | -.25a |  |  |  |  |
| Sig (2-tailed) | .003 | .79 | .003 | < .001 |  |  |  |  |
|  |  |  |  |  |  |  |  |  |
| 1. Physical Health | .04 | .16b | .07 | -.27a | .39a |  |  |  |
| Sig (2-tailed) | .61 | .03 | .30 | < .001 | < .001 |  |  |  |
|  |  |  |  |  |  |  |  |  |
| 1. Mental Health | .12 | .10 | .15b | -.23a | .67a | .60a |  |  |
| Sig (2-tailed) | .09 | .16 | .04 | <.001 | < .001 | < .001 |  |  |
|  |  |  |  |  |  |  |  |  |
| 1. Flourishing | .13 | .07 | .20a | -.15b | .62a | .43a | .62a |  |
| Sig (2-tailed) | .07 | .36 | .006 | .04 | < .001 | < .001 | < .001 |  |
|  |  |  |  |  |  |  |  |  |
| 1. Depressive Symptoms | -.22a | -.06 | -.17b | .22a | -.61a | -.37a | -.65a | -.64a |
| Sig (2-tailed) | .002 | .40 | .02 | .003 | < .001 | < .001 | < .001 | < .001 |
|  |  |  |  |  |  |  |  |  |

*Note.* Living Situation = Living with others (anchored against living alone), Gender = Male (anchored against referent Female, Chronic Conditions = Number of chronic health conditions. aCorrelation is significant at the .01 level (2-tailed). bCorrelation is significant at the .05 level (2-tailed).
